# Supplementary material for: Evaluation of macrophage activation syndrome in hospitalised patients with Kikuchi-Fujimoto disease based on the 2016 EULAR/ACR/PRINTO classification criteria
Source: PLoS One. 2019 Jul 18;14(7):e0219970. doi: 10.1371/journal.pone.0219970 (PMC6638985; doi:10.1371/journal.pone.0219970)
Supplement: S1 File — The raw data of this study are shown in the excel file. (XLSX) [file pone.0219970.s004.xlsx]

## Sheet: Kikuchi MAS
Age	Sex	Adm_Exp	90day-mortality	90day	Adm_Day	Group	Hscore (#)	Hscore (Probability)	2004-HLH	2016-MAS	First lab date	WBC	Hb	Plt	ESR	CRP	Neutrophil	Lymphocyte	BUN	Cr	T.Prot	Alb	AST	ALT	T.Bil	LD(LDH)	Ferritin	TG	Fibrinogen	Fever peak	ICU care	RRT	BM study	Hemophagocytosis	PET/CT	Spleen Uptake	Treatment	Fever	Lymphadenopathy	Hepatomegaly	Splenomegaly	Skin rash	Joint pain
51	0	0	0	90	66	1	119	4.68	0	1	2016-12-12	11470	12.8	15	74	209.5	9760	580	87.1	2.03	4.8	2.1	32	10	1.6	330	1441.8	163	n/a	38.4	0	1	Yes	No	Yes	Yes	Steroid, IVIG	1	1	0	1	0	0
20	1	0	0	90	32	1	220	96.26	1	1	2015-11-19	10820	10.6	195	52	205.1	9460	690	9.3	0.77	6	3.3	224	111	0.4	1650	13857.3	156	338	40.3	0	0	Yes	Yes	Yes	Yes	Steroid, IVIG, Cipol	1	1	0	1	1	0
57	1	1	0	90	281	2	96	1.16	1	1	2015-09-09	1930	9.6	97	49	119.8	310	1467	8	0.43	6.7	3.1	22	16	0.6	146	528.9	100	n/a	40.2	1	1	Yes	No	N/A	N/A	Steroid	1	1	0	1	1	0
37	0	0	0	31	14	1	91	0.85	0	1	2012-05-19	4300	14.6	143	53	72.8	3040	94	16.2	1.07	7.6	4	49	44	0.7	554	878.3	n/a	n/a	40.1	0	0	Yes	No	Yes	Yes	Steroid	1	1	0	1	0	0
27	1	0	0	90	11	1	112	3.08	0	1	2016-05-02	2350	10.9	218	43	100.1	1500	650	3.9	0.43	6	3.4	344	326	0.4	842	747.5	133	260	39.7	0	0	Yes	No	Yes	Yes	NSAID	1	1	0	0	1	0
38	0	0	0	77	42	1	111	2.9	0	1	2011-07-28	3620	14.5	78	31	53.29	1740	1410	8.2	1.13	6.8	3.7	61	30	0.5	459	726.7	82	n/a	38.5	0	0	Yes	Yes	Yes	Yes	Steroid	1	1	0	0	0	0
61	1	1	1	32	32	1	186	75.8	0	1	2008-09-17	2500	9.3	92	73	39.5	1700	580	5.7	0.6	5.8	3.1	96	38	0.6	1408	15363	163	377	40.3	1	1	Yes	No	N/A	N/A	Steroid, IVIG	1	1	0	0	0	0
49	1	0	0	90	13	1	166	47.55	0	1	2008-07-11	7510	13	77	44	8.11	5557	525.7	13.9	0.7	5.7	2.5	576	367	0.9	1281	7734	389	n/a	38.9	1	0	Yes	No	N/A	N/A	Steroid	1	1	0	0	0	0
33	0	0	0	90	7	1	68	0.2	0	1	2007-10-16	3640	15.1	146	33	63.4	2190	1170	18	1.1	7.5	4.2	69	60	0.7	979	1500	n/a	n/a	39.5	0	0	Yes	No	Yes	No	NSAID	1	1	0	0	0	0
32	1	0	0	90	14	2	72	0.26	0	1	2014-12-24	1740	12.5	121	48	25.4	1160	460	8.5	0.41	6.6	3.6	24	9	0.2	226	246.2	119	n/a	39.5	0	0	Yes	No	Yes	Yes	Steroid	1	1	0	1	0	0
32	0	0	0	22	12	1	75	0.32	0	1	2013-05-21	2560	14.3	218	22	16.56	1870	520	9.2	0.75	6.9	4	125	162	0.7	520	1364.4	81	297	39.4	0	0	Yes	No	N/A	N/A	Antibiotics	1	1	0	1	0	0
35	1	0	0	90	242	1	131	9.38	0	1	2015-07-17	150	10.6	135	73	48	90	40	60.1	12.1	5.7	2.4	94	157	0.4	591	5745.8	209	640	39	1	1	Yes	No	N/A	N/A	Steroid	1	1	0	0	0	0
54	1	0	0	36	8	1	52	0.077	0	1	2015-12-09	1750	9.5	112	63	52	990	620	8.4	0.52	6.5	3.1	73	12	0.4	442	1322.9	n/a	n/a	39.2	0	0	N/A	N/A	N/A	N/A	NSAID	1	1	0	0	1	0
59	1	0	0	29	10	1	68	0.2	0	1	2015-04-10	2320	11.6	173	71	14.7	1250	940	16	0.63	6.2	3.5	66	45	0.3	859	1553.4	n/a	n/a	39.5	0	0	N/A	N/A	Yes	No	NSAID	1	1	0	0	0	0
31	1	0	0	90	11	1	52	0.077	0	1	2012-07-16	2850	12.9	123	44	52	2223	427.5	5.9	0.71	6.7	3.7	285	149	1	561	1064.4	n/a	n/a	39.3	0	0	N/A	N/A	N/A	N/A	Supportive	1	1	0	0	0	0
52	1	1	1	11	11	1	186	75.8	0	1	2011-10-24	4870	10	69	62	76.36	3457.7	827.9	4.3	0.46	6.5	3.1	132	14	0.2	1178	14399.9	151	n/a	39.9	1	0	N/A	N/A	Yes	Yes	Steroid	1	1	0	0	1	1
56	0	1	1	24	24	2	52	0.077	0	1	2016-07-27	22940	13.5	346	64	32.6	16550	4600	14.4	0.79	7.1	3.6	204	144	0.6	1249	441.8	n/a	n/a	38.8	1	1	N/A	N/A	Yes	No	Steroid, IVIG	1	1	0	0	0	0
77	1	0	0	90	49	1	126	7.05	0	1	2014-01-11	13050	9.4	461	120	122	11490	830	14	0.67	6	2.8	146	68	0.2	2597	1500	147	195	38.8	0	0	N/A	N/A	Yes	No	NSAID	1	1	0	0	0	0
68	0	1	1	8	8	1	136	12.36	0	1	2011-03-02	4560	10.7	133	120	228	4110	340	29.8	1.75	5.7	2.5	178	185	1.3	1027	13308.3	n/a	425	40.3	1	1	N/A	N/A	Yes	No	Steroid	1	1	0	0	1	0
35	1	0	0	90	10	2	98	1.32	0	1	2014-11-11	6560	10.7	262	72	80.5	5600	580	8.3	0.47	6.1	3.1	43	30	0.4	461	1462.5	60	186	39.7	0	0	N/A	N/A	Yes	Yes	Steroid	1	1	0	0	0	1
25	1	0	0	90	17	1	126	7.05	0	1	2016-09-12	5250	11.7	165	30	30	3850	940	5.6	0.41	5.9	3.1	632	178	0.5	701	3180.3	115	n/a	39.8	0	0	N/A	N/A	N/A	N/A	Steroid, Oxiklorin	1	1	0	1	1	0
35	0	0	0	39	11	1	92	0.91	0	1	2007-08-10	1370	12.4	72	36	3.36	680	540	12.3	1	6.2	3.6	64	23	0.3	872	700	87	n/a	39.7	0	0	N/A	N/A	N/A	N/A	NSAID	1	1	0	0	0	0
42	1	0	0	90	10	1	68	0.2	0	1	2010-10-19	2950	9.8	143	74	94.03	2510	270	11	0.92	7.4	3.4	93	41	0.7	227	1457.5	n/a	n/a	39.6	0	0	N/A	N/A	N/A	N/A	Steroid	1	1	0	0	0	0
48	0	0	0	90	11	1	52	0.077	0	1	2016-07-16	2720	13.3	146	19	12.5	1640	970	18.6	1.09	6.8	3.7	64	23	0.4	1780	1042.3	n/a	n/a	38.8	0	0	N/A	N/A	Yes	Yes	Steroid	1	1	0	0	0	1
69	1	0	0	90	48	3	118	4.41	0	0	2008-08-22	10550	10.2	288	108	255	9330	980	10.1	0.8	5.8	3	34	19	0.3	414	9435.6	n/a	n/a	39.8	0	0	Yes	No	Yes	No	Steroid	1	1	0	0	1	0
40	1	0	0	90	7	3	75	0.32	0	0	2013-05-10	1930	10.5	135	80	20	1360	450	8	0.46	7.2	4.1	50	28	0.4	611	289.3	n/a	n/a	38.6	0	0	Yes	No	N/A	N/A	NSAID	1	1	0	1	0	0
35	0	0	0	90	11	3	80	0.43	0	0	2015-04-09	2910	14.5	110	46	14	1820	760	14.5	0.79	6.8	4.1	21	14	0.2	299	128.3	n/a	n/a	38.8	0	0	Yes	No	N/A	N/A	NSAID	1	1	0	1	0	0
29	1	0	0	90	17	3	68	0.2	0	0	2012-01-16	1740	13.1	149	22	15.41	680	810	9.5	0.64	7	4.3	39	18	0.6	201	44.7	n/a	n/a	39.7	0	0	Yes	No	N/A	N/A	NSAID	1	1	0	0	0	0
27	1	0	0	90	22	3	49	0.064	0	0	2006-07-01	6540	10.2	318	86	61	4890	990	5.3	0.7	8	3.9	17	9	0.2	459	266.6	88	n/a	39.9	0	0	Yes	No	N/A	N/A	Steroid, MTX, NSAID	1	1	0	0	1	1
24	1	0	0	90	8	3	75	0.32	0	0	2011-05-18	1320	11.7	127	62	2.3	650	520	4	0.41	7	3.8	87	46	0.2	1454	224.9	116	n/a	38.5	0	0	Yes	No	N/A	N/A	Oxiklorin	1	1	0	1	0	0
18	1	0	0	90	9	3	0	0.003	0	0	2014-05-01	1760	10.8	162	60	8.1	530	880	7	0.47	6.5	3.6	27	10	0.2	490	253.5	90	338	38.3	0	0	Yes	No	N/A	N/A	NSAID	1	1	0	0	0	0
52	1	0	0	90	14	3	87	0.67	0	0	2009-05-13	2260	10.6	215	109	18.6	1900	220	13.4	0.91	8.1	4.1	102	54	0.7	1078	5346.4	n/a	n/a	39.1	0	0	N/A	N/A	N/A	N/A	Steroid	1	1	0	0	1	0
43	0	0	0	90	9	3	75	0.32	0	0	2009-07-23	3190	13.6	134	56	43	1880	990	11.8	1.1	6.6	4.1	31	27	0.3	848	543.9	n/a	n/a	39	0	0	N/A	N/A	N/A	N/A	Supportive	1	1	0	1	0	0
42	0	0	0	90	11	3	33	0.023	0	0	2009-03-28	3680	13.2	284	29	3.76	2110	1180	13.5	0.97	6.8	4.1	17	19	0.2	252	229.4	n/a	n/a	39.1	0	0	N/A	N/A	N/A	N/A	NSAID	1	1	0	0	1	0
40	0	0	0	90	10	3	33	0.023	0	0	2012-02-13	4350	13.1	243	60	36.85	2430	1370	9	0.92	7.1	4	16	13	0.4	325	352.4	n/a	n/a	38.7	0	0	N/A	N/A	Yes	Yes	Steroid	1	1	0	0	0	0
39	0	0	0	90	7	3	52	0.077	0	0	2007-01-30	2960	13.2	195	59	35.4	1690	1030	9.8	0.9	7.1	4.1	67	33	0.4	1063	740	n/a	n/a	38.6	0	0	N/A	N/A	N/A	N/A	Steroid	1	1	0	0	0	0
39	1	0	0	90	9	3	33	0.023	0	0	2014-05-26	2380	12	159	77	8.2	1340	860	19.6	1.26	7.1	3.6	29	24	0.6	278	283	n/a	n/a	39.1	0	0	N/A	N/A	N/A	N/A	Steroid	1	1	0	0	0	0
39	1	0	0	90	14	3	112	3.08	0	0	2009-09-17	26680	9.8	303	7	37.1	17075	4802	8.6	0.68	5.3	3.5	94	135	1.4	715	113	209	n/a	40	0	0	N/A	N/A	N/A	N/A	Steroid	1	1	0	0	1	0
39	1	0	0	90	9	3	33	0.23	0	0	2008-07-07	4810	12.6	283	35	11.8	3050	1400	5.6	0.8	7.4	4.2	22	14	0.4	545	153.9	n/a	n/a	39.2	0	0	N/A	N/A	N/A	N/A	NSAID	1	1	0	0	0	0
37	1	0	0	90	4	3	49	0.064	0	0	2011-06-07	6080	12.2	134	95	212.94	5050	790	5.8	0.55	6.4	3.5	27	17	0.5	390	334.2	n/a	n/a	39.7	0	0	N/A	N/A	N/A	N/A	Steroid	1	1	0	0	0	0
36	0	0	0	90	6	3	19	0.009	0	0	2009-10-04	2450	15.7	194	16	4.5	1350	900	8.8	0.96	7.7	5.1	35	42	1	245	521.1	n/a	n/a	38.2	0	0	N/A	N/A	N/A	N/A	NSAID	1	1	0	0	0	0
35	1	0	0	90	9	3	19	0.009	0	0	2012-04-30	2980	11.8	237	44	1.97	1050	1590	17	0.53	6.9	4.3	29	38	0.6	291	41.2	78	n/a	38.2	0	0	N/A	N/A	N/A	N/A	Supportive	1	1	0	0	0	0
33	1	0	0	90	8	3	33	0.023	0	0	2012-08-16	6300	13	196	77	13.4	4320	1360	12.8	0.53	7.2	3.8	25	22	0.2	306	112	n/a	n/a	39	0	0	N/A	N/A	N/A	N/A	Steroid	1	1	0	0	0	0
33	1	0	0	90	9	3	19	0.009	0	0	2006-07-18	1730	13.4	155	16	12	800	740	8	0.7	8.4	4.6	35	42	0.4	442	125.4	n/a	n/a	38.3	0	0	N/A	N/A	N/A	N/A	Supportive	1	1	0	0	0	0
29	0	0	0	90	4	3	52	0.077	0	0	2009-03-16	3850	14.2	209	17	19.2	1310	2140	12.9	1.08	7.1	4.3	34	23	0.5	363	363.2	n/a	n/a	38.5	0	0	N/A	N/A	N/A	N/A	NSAID	1	1	0	0	0	0
29	1	0	0	90	11	3	57	0.1	0	0	2017-02-01	2060	8.1	143	8	7.9	1310	580	2.7	0.35	4.5	2.2	20	16	0.1	356	252.9	n/a	n/a	39.1	0	0	N/A	N/A	N/A	N/A	NSAID	1	1	0	0	0	0
28	1	0	0	90	4	3	33	0.023	0	0	2015-02-15	5720	12.6	176	49	16.3	3340	1800	17.6	0.52	7.7	4.2	20	10	0.2	269	61.2	n/a	n/a	38.6	0	0	N/A	N/A	N/A	N/A	Steroid	1	1	0	0	0	0
27	1	0	0	90	17	3	56	0.098	0	0	2017-02-20	5600	10.8	325	59	44.4	4140	1000	5.3	0.6	7	3.7	27	21	0.2	422	286.8	n/a	n/a	38.9	0	0	N/A	N/A	Yes	No	Steroid	1	1	0	1	0	0
27	1	0	0	90	5	3	52	0.077	0	0	2006-12-18	3930	12.9	181	22	4.36	2570	990	8.2	0.7	7.7	4.4	28	18	0.2	578	240	n/a	n/a	39	0	0	N/A	N/A	N/A	N/A	Steroid	1	1	0	0	0	0
27	1	0	0	90	6	3	33	0.023	0	0	2015-12-08	8590	11.7	268	87	28	6500	1370	8.1	0.54	8.2	4.4	20	20	0.3	226	125.2	n/a	n/a	39	0	0	N/A	N/A	N/A	N/A	Steroid, NSAID	1	1	0	0	0	0
26	1	0	0	90	9	3	33	0.023	0	0	2015-07-16	5230	11.9	308	81	55.2	3320	1360	10	0.57	6.6	3.7	23	16	0.2	255	96.9	n/a	n/a	38.7	0	0	N/A	N/A	N/A	N/A	Tylenol	1	1	0	0	0	0
26	1	0	0	90	4	3	33	0.023	0	0	2011-12-10	2280	12.8	145	38	7.5	1080	950	11.1	0.66	7	4.4	20	10	0.9	412	88.7	n/a	n/a	38.6	0	0	N/A	N/A	N/A	N/A	NSAID	1	1	0	0	0	0
26	1	0	0	90	6	3	19	0.009	0	0	2016-07-12	2140	12.3	115	25	3.6	830	1040	11.5	0.57	7.5	4	147	241	0.5	624	178.6	n/a	n/a	37.8	0	0	N/A	N/A	N/A	N/A	NSAID	1	1	0	0	0	0
26	0	0	0	90	11	3	91	0.85	0	0	2008-08-25	3060	14.1	184	9	52.3	1520	1180	8.9	1	7.4	4.2	32	25	0.7	1008	350.7	n/a	n/a	39.6	0	0	N/A	N/A	Yes	No	Supportive	1	1	0	1	0	0
25	1	0	0	90	7	3	49	0.064	0	0	2017-03-31	5860	10.6	230	23	39.9	3380	1470	5.5	0.44	5.1	2.9	17	6	0.2	313	64.4	n/a	n/a	39.5	0	0	N/A	N/A	N/A	N/A	NSAID	1	1	0	0	0	0
24	0	0	0	90	8	3	68	0.2	0	0	2012-05-16	5300	14.9	269	50	25.18	3130	1380	9.9	0.57	6.4	3.5	71	109	0.4	341	549	n/a	n/a	39.5	0	0	N/A	N/A	Yes	No	NSAID	1	1	0	0	0	0
24	1	0	0	90	44	3	52	0.077	0	0	2016-01-14	3460	11.6	124	51	3.8	2130	930	8	0.56	7.2	4	35	33	0.4	304	31.1	41	346	39	0	0	N/A	N/A	Yes	No	Steroid	1	1	0	0	0	0
23	0	0	0	90	8	3	49	0.064	0	0	2010-06-22	3450	14.7	181	33	62.2	2060	1060	12.7	1.04	7.2	3.7	29	17	0.44	500	690.9	n/a	n/a	39.5	0	0	N/A	N/A	N/A	N/A	NSAID	1	1	0	0	0	0
23	1	0	0	90	4	3	90	0.8	0	0	2013-10-26	3490	12	218	34	37	2120	97	6.7	0.62	6	3.1	207	129	0.3	859	587.3	n/a	n/a	38.6	0	0	N/A	N/A	N/A	N/A	NSAID	1	1	1	1	0	0
22	0	0	0	90	16	3	141	16.13	0	0	2011-10-14	2350	12	210	95	127.56	1560	510	13.4	0.73	6.4	3.4	85	51	0.3	1084	2298.4	97	n/a	39.9	0	0	N/A	N/A	Yes	No	Tylenol	1	1	1	1	0	0
22	0	0	0	90	5	3	52	0.077	0	0	2015-09-16	3820	14.6	159	14	2.2	2810	690	15.6	0.65	6	3.6	57	108	0.4	639	265.6	n/a	n/a	39.1	0	0	N/A	N/A	N/A	N/A	Steroid	1	1	0	0	1	0
22	0	0	0	90	9	3	71	0.25	0	0	2010-10-12	2990	12.1	195	63	85.14	1940	700	8.4	0.73	6.4	4	22	20	0.7	437	1653	n/a	n/a	39.1	0	0	N/A	N/A	N/A	N/A	Supportive	1	1	1	1	0	0
22	1	0	0	90	22	3	72	0.26	0	0	2008-07-27	3910	11.1	257	87	20.4	2570	990	9.2	0.9	7.8	4	28	13	0.4	289	360.6	n/a	n/a	40.6	0	0	N/A	N/A	N/A	N/A	Steroid	1	1	1	0	1	0
22	1	0	0	90	3	3	19	0.009	0	0	2009-10-21	4020	12.3	397	31	1.88	1520	1930	9.3	0.59	7.6	4.8	28	41	0.5	288	99.8	n/a	n/a	37.8	0	0	N/A	N/A	N/A	N/A	NSAID	1	1	0	0	0	0
21	0	0	0	90	8	3	90	0.8	0	0	2007-11-20	1650	13.1	146	45	4.42	550	870	8.5	0.9	7.2	4.6	36	17	0.6	1383	1025	n/a	n/a	39.3	0	0	N/A	N/A	Yes	No	Steroid, NSAID	1	1	1	1	0	0
21	0	0	0	90	12	3	91	0.85	0	0	2008-10-27	2540	14.8	315	30	14.5	939.8	1168.4	8.8	0.86	6.8	3.7	77	100	0.3	545	1148.1	n/a	n/a	40.2	0	0	N/A	N/A	N/A	N/A	Supportive	1	1	1	0	0	0
21	1	0	0	90	11	3	33	0.023	0	0	2009-08-03	2250	13.8	172	37	3.05	930	1050	8.9	0.76	8.3	4.8	22	14	0.5	278	102.1	n/a	n/a	38.4	0	0	N/A	N/A	N/A	N/A	NSAID	1	1	0	0	0	0
21	1	0	0	90	5	3	33	0.023	0	0	2016-07-13	5000	12.1	247	57	8.8	2610	1540	7.8	0.56	7.7	4.1	22	13	0.3	518	55.5	n/a	n/a	38.9	0	0	N/A	N/A	N/A	N/A	NSAID	1	1	0	0	0	0
20	1	0	0	90	12	3	33	0.023	0	0	2015-07-13	4390	13.4	260	69	37	2660	1280	11.3	0.68	7.1	3.9	29	24	0.2	252	145.8	n/a	n/a	38.4	0	0	N/A	N/A	N/A	N/A	NSAID	1	1	0	0	0	0
20	1	0	0	90	5	3	0	0.003	0	0	2012-10-24	2550	12.3	182	64	2.95	920	1350	9.8	0.52	7.4	4	29	23	0.4	512	437	n/a	n/a	38.3	0	0	N/A	N/A	N/A	N/A	Steroid	1	1	0	0	0	0
19	1	0	0	90	7	3	0	0.003	0	0	2011-11-05	17490	13.1	452	55	1	12990	2640	9.3	0.59	7.3	4.5	14	23	0.9	212	133.9	n/a	n/a	37.8	0	0	N/A	N/A	N/A	N/A	Steroid	1	1	0	0	0	0
18	1	0	0	90	8	3	19	0.009	0	0	2005-12-05	4450	12.6	221	27	10	2840	1320	11	0.7	7.6	4.7	30	13	0.3	741	79	42	n/a	38	0	0	N/A	N/A	N/A	N/A	Supportive	1	1	0	0	1	0
18	1	0	0	90	7	3	19	0.009	0	0	2013-08-09	3320	12	207	48	9.35	1910	1150	8	0.58	7.1	4	67	58	0.3	485	156	n/a	n/a	38.3	0	0	N/A	N/A	N/A	N/A	Steroid	1	1	0	0	0	0
18	1	0	0	90	22	3	75	0.32	0	0	2009-11-12	5480	12.6	233	54	151	3890	1200	6.2	0.71	7.3	4.4	32	22	0.2	272	116.6	n/a	n/a	38.8	0	0	N/A	N/A	N/A	N/A	Supportive	1	1	0	1	0	0
17	1	0	0	90	8	3	52	0.077	0	0	2012-11-22	2300	12.1	162	23	13.27	850	1150	7.8	0.42	6.7	3.8	83	14	0.3	447	67	n/a	n/a	38.8	0	0	N/A	N/A	N/A	N/A	NSAID	1	1	0	0	0	0
17	0	0	0	90	12	3	72	0.26	0	0	2011-08-04	4790	14.7	141	34	56.1	2710	1660	11.5	0.68	6.5	4.2	23	22	0.7	618	405.2	n/a	n/a	39.8	0	0	N/A	N/A	N/A	N/A	Steroid	1	1	0	1	0	0
16	0	0	0	90	7	3	49	0.064	0	0	2008-06-12	4970	13.5	269	7	14	1860	2650	11.4	0.8	6.8	4.2	19	6	0.4	479	63.2	n/a	n/a	39.5	0	0	N/A	N/A	N/A	N/A	NSAID	1	1	0	0	0	0
15	1	0	0	90	5	3	33	0.023	0	0	2014-01-29	1780	11.4	113	68	28	900	790	7.7	0.7	7.2	3.8	27	8	0.3	547	245.5	n/a	n/a	38.6	0	0	N/A	N/A	N/A	N/A	Steroid	1	1	0	0	0	0

## Sheet: Comparison
Group_Num	Age	Sex	Adm_Exp	90day-mortality	90day	Adm_Day	Hscore	Hscore (%)	HLH-2004	Group	Hepatomegaly	Splenomegaly	LNadenopathy	WBC	Hb	Plt	ESR	CRP	Neutrophil	Lymphocyte	BUN	Cr	T.Prot	Alb	AST	ALT	T.Bil	LD(LDH)	Ferritin	TG	Fibrinogen
3	68	1	0	0	16	7	63	0.15	0	1	0	0	1	2450	10.6	168	41	6.4	1920	340	28.3	1.14	5.8	2.7	38	37	0.4	237	734.3	167	256
3	17	1	0	0	90	14	52	0.077	0	2	0	0	1	4590	12.8	166	64	15.6	2800	1520	7.6	0.45	7.3	4	47	16	0.4	579	385.2	n/a	n/a
3	40	1	0	0	45	45	120	4.97	0	2	0	0	1	2390	9.2	131	38	11.8	1310	720	7	0.46	6.6	3.3	31	23	0.5	265	183.2	173	353
3	26	1	0	0	90	25	254	99.53	1	1	1	1	0	1070	9.3	110	12	59.9	740	280	14.4	0.95	5.2	2.3	382	73	2	2720	45958.4	299	170
3	20	1	0	0	90	16	67	0.19	0	2	0	0	1	2880	11.5	187	29	4.7	2130	470	11.5	0.69	6.4	3.2	24	12	0.3	408	98.7	n/a	390
3	41	1	0	0	90	15	170	53.74	0	1	0	1	1	2510	10	159	44	24.6	2030	340	12.7	0.66	6.5	3	278	138	0.4	1011	2124.1	205	n/a
3	28	1	0	0	90	35	121	5.27	1	1	0	0	0	2320	8.1	75	25	3.2	1790	290	4.9	0.46	5.5	2.5	110	63	0.4	608	1862.4	n/a	n/a
3	40	1	0	0	90	38	108	2.42	0	1	0	0	1	11940	8.2	55	4	51.8	10600	460	32	1.78	4.4	1.9	223	77	2.9	620	3405.6	n/a	80
3	56	1	0	0	90	27	160	38.46	0	1	0	0	0	14230	8.6	144	29	27.8	9320	4040	27.4	1.56	5.7	3.3	20	14	0.4	543	2324.7	239	200
3	68	1	1	1	30	30	19	0.009	0	1	0	0	1	4890	9.7	134	108	69.1	3960	610	11.9	0.5	5.9	2.7	50	10	0.5	377	1054.4	n/a	n/a
3	59	1	0	0	48	29	78	0.38	0	1	0	0	1	1080	10.7	109	53	9.6	410	550	33	0.83	7.1	3.2	52	16	0.6	659	3860.3	173	n/a
3	42	1	0	0	90	22	96	1.16	0	1	0	0	1	1600	10.2	158	70	46.3	1230	200	6.6	0.35	4.8	2.2	93	25	0.2	691	1247.9	143	321
3	44	1	1	0	90	127	98	1.32	0	1	0	0	1	23910	8.5	80	106	142.69	22420	780	25.2	1.14	6	2	216	43	3.4	1237	1899.5	n/a	202
3	54	1	0	0	90	18	52	0.077	0	1	0	0	1	2320	11.1	155	34	1.1	1624	487.2	12.9	0.62	6.2	3.5	84	49	0.3	508	1485.1	n/a	n/a
3	21	1	0	0	90	70	189	79.05	0	1	0	1	1	3230	10.6	99	42	4.3	2520	490	16.7	1.5	5.3	1.4	100	27	0.8	390	1808.8	225	138
3	43	1	1	0	90	220	84	0.55	0	1	0	1	0	9520	6.8	21	61	186.3	7711.2	1428	107.1	3.38	6	3	35	28	1.7	1224	1101.1	n/a	235
3	20	1	1	1	23	23	140	15.31	0	2	0	1	1	1690	10.1	160	43	17.3	1140	400	6.6	0.66	6.2	2.9	66	21	0.3	636	497.1	116	250
3	18	1	0	0	90	8	70	0.23	0	1	0	0	0	1180	10.7	148	50	2	920.4	177	10.6	0.76	6.1	3.2	107	68	0.3	696	1481.8	n/a	n/a
3	31	0	0	0	90	13	131	9.38	0	1	0	0	1	6210	13.7	268	43	1	4270	1020	17.5	0.89	7.5	4.3	90	125	0.7	257	2245.7	249	n/a
3	64	0	1	1	23	23	120	4.97	0	1	0	0	0	5060	9	106	93	6.4	3840	880	21.4	0.81	6.9	2.5	183	92	0.3	338	1858.2	141	273
3	28	1	0	0	90	15	93	0.97	0	1	0	0	1	1900	12.8	140	19	13.6	1558	190	6.4	0.78	6.1	3.2	95	39	0.2	858	1873.5	150	212
3	24	1	0	0	90	17	224	97.06	1	1	0	1	1	1800	8.7	90	18	12.8	1460	240	15.9	0.9	5.7	2.6	151	47	0.3	662	764.9	284	118
3	30	1	0	0	90	19	89	0.75	0	2	1	1	1	20810	11.7	376	37	58.6	18930	1290	10	0.71	8.7	4.3	24	17	0.6	177	179.2	65	329
3	55	1	1	1	20	20	86	0.63	0	2	0	0	0	4930	7.2	104	77	151	4330	380	20.9	0.92	6	2.2	114	54	0.3	312	520.1	n/a	241
3	21	0	1	1	14	14	212	94.01	0	1	1	1	1	2780	12.1	93	34	6.7	2250	300	14.9	1.35	6.5	2.8	1567	499	0.9	2739	15000	n/a	153
3	15	1	0	0	90	18	150	25.16	0	1	0	0	0	2630	11	91	32	1.3	1840	670	8.2	0.55	6.5	3.1	88	39	0.4	524	1204.7	195	240
3	26	0	0	0	90	24	134	11.08	0	2	1	1	0	3110	13.2	182	29	5.9	1280	1560	5.4	0.79	7.3	3.8	86	116	0.4	762	657.8	171	286
3	24	1	1	1	13	13	126	7.05	0	1	0	0	0	930	9.4	77	10	13.4	840	30	112.7	3.7	3.3	1.8	50	26	2.9	675	7970.4	n/a	364
3	62	1	1	1	48	48	94	1.03	0	2	0	0	0	3710	7.5	132	52	166.5	3390	190	31.5	0.86	4.6	2.3	22	34	0.4	479	546	82	n/a
3	20	1	0	0	19	19	112	3.08	0	1	0	0	0	11320	8.1	98	44	84.2	10480	310	8.5	0.8	5.5	2.8	52	29	0.5	741	957.4	340	n/a
3	34	1	0	0	90	15	63	0.15	0	1	0	0	1	2710	10.1	148	23	1	1970	540	16.6	0.7	4.8	2.2	81	62	0.4	819	701.7	274	n/a
3	15	1	0	0	90	18	141	16.13	0	1	1	1	1	1260	10.3	106	7	1	450	680	4.4	0.6	5.6	3	759	286	0.7	2285	3896.5	n/a	297
3	52	0	0	0	90	69	99	1.4	0	2	0	1	0	2640	10.9	95	33	70.2	2000	470	17.3	1.2	6.5	3.4	33	29	0.3	538	589.7	n/a	n/a
3	33	1	0	0	90	20	156	32.78	0	1	1	1	1	2700	10.3	146	81	34.1	1990	500	6	0.51	7.8	3.3	120	38	0.3	1255	10161.8	n/a	n/a
3	29	1	1	1	21	21	123	5.93	0	1	1	0	0	6730	8.4	96	2	6.2	3850	2290	13.7	1	3.5	2	157	26	2.6	766	727.3	n/a	60
3	48	0	1	1	23	23	52	0.077	0	2	0	0	1	13250	7.7	222	99	271	12330	690	30	1.4	7.8	2.4	70	61	0.3	409	777	n/a	n/a
3	16	1	0	0	90	12	86	0.63	0	1	0	1	0	1460	8.8	145	40	1	710	620	12.7	0.7	6.6	3.3	54	24	0.6	803	1558.2	295	n/a
3	46	1	0	0	90	17	112	3.08	0	1	0	0	1	3740	8.9	147	23	31.5	2690	790	15.9	1.1	5.2	2.5	84	58	0.3	1253	1717.2	144	n/a
3	44	1	0	0	90	12	53	0.082	0	1	0	0	0	2160	9	105	55	0.3	1150	870	18.8	1	6.5	3.5	101	66	0.5	621	882	n/a	n/a
3	23	1	0	0	90	27	137	13.05	0	1	0	0	0	1130	7.7	50	29	5.5	850	190	12.8	0.7	4.8	2.4	262	102	0.2	1214	7360.4	347	295
3	28	1	0	0	90	10	120	4.97	0	1	0	0	1	1480	7.6	167	45	3.2	920	360	7.5	0.7	6.4	3	342	106	0.3	817	1528.9	309	n/a
3	61	1	1	0	90	246	52	0.077	0	1	0	0	0	5070	10.9	181	42	3.4	4320	590	12.2	0.77	4.2	2	60	34	0.2	n/a	933.8	n/a	n/a
3	26	1	1	1	2	2	110	2.73	0	1	0	0	0	4990	11.4	81	34	6.5	4060	480	11.7	0.6	6.2	2.7	223	58	0.6	997	1109.1	n/a	n/a
3	27	1	0	0	90	7	61	0.13	0	1	0	0	0	800	9.3	87	120	9.7	368	368	8.8	0.4	8.4	3.6	217	132	0.7	1398	1138.5	n/a	n/a
3	28	1	1	1	36	36	70	0.23	0	2	0	0	1	23800	10.9	370	81	76.7	21180	2050	43.3	2.3	5.5	3.3	57	16	0.3	2113	255.4	n/a	614
3	48	1	0	0	90	12	120	4.97	0	1	0	0	0	2380	9.5	127	66	7.6	1970	240	14.7	0.97	6.8	3.4	1452	642	0.6	n/a	9607.6	n/a	n/a
3	44	1	0	0	90	12	212	94.01	0	1	1	0	1	1500	10.1	45	91	248	855	465	13.7	0.71	7.4	3.9	66	28	0.7	923	2943.1	274	410
3	43	0	0	0	27	9	76	0.34	0	1	0	0	0	720	11.3	79	80	10.9	612	72	10.8	0.64	7.5	2.6	23	14	0.2	125	1644.4	111	285
3	45	1	1	1	66	66	68	0.2	0	1	0	0	0	20990	12.5	22	56	52	18230	1420	33.2	1.61	6.6	2.7	48	20	1	358	1293	n/a	713
3	50	1	1	0	90	92	93	0.97	0	2	0	1	1	3190	9	109	30	37.7	1650	1080	17.7	1.4	8.9	4.1	26	12	0.9	466	754.9	n/a	n/a
3	26	1	1	1	18	18	117	4.16	0	1	0	0	1	8390	7.2	109	79	141	7660	540	57.1	2.4	7.3	3	255	25	0.4	4093	35270	n/a	92
3	55	1	1	1	17	17	128	7.91	0	1	0	1	0	3710	12.6	127	71	171	3520	100	40.7	1.7	4.7	2.6	104	17	0.2	2296	2052.3	n/a	n/a
3	50	1	0	0	90	20	170	53.74	0	1	0	1	1	6760	10.9	95	120	178.4	5660	790	9.8	0.45	7.8	2.4	96	58	0.6	939	2654.4	163	374
3	49	0	1	1	4	4	174	59.82	0	1	0	0	0	12320	11.5	22	19	20.2	11344.4	492.8	44.6	5.75	5.5	2.5	1677	1027	0.9	5920	15000	165	135
2	51	0	0	0	90	66	119	4.68	0	1	0	1	1	11470	12.8	15	74	209.5	9760	580	87.1	2.03	4.8	2.1	32	10	1.6	330	1441.8	163	n/a
2	54	1	0	0	36	8	52	0.077	0	1	0	0	1	1750	9.5	112	63	52	990	620	8.4	0.52	6.5	3.1	73	12	0.4	442	1322.9	n/a	n/a
2	20	1	0	0	90	32	220	96.26	1	1	0	1	1	10820	10.6	195	52	205.1	9460	690	9.3	0.77	6	3.3	224	111	0.4	1650	13857.3	156	338
2	57	1	1	0	90	281	96	1.16	1	2	0	1	1	1930	9.6	97	49	119.8	310	1467	8	0.43	6.7	3.1	22	16	0.6	146	528.9	100	n/a
2	59	1	0	0	29	10	68	0.2	0	1	0	0	1	2320	11.6	173	71	14.7	1250	940	16	0.63	6.2	3.5	66	45	0.3	859	1553.4	n/a	n/a
2	31	1	0	0	90	11	52	0.077	0	1	0	0	1	2850	12.9	123	44	52	2223	427.5	5.9	0.71	6.7	3.7	285	149	1	561	1064.4	n/a	n/a
2	37	0	0	0	31	14	91	0.85	0	1	0	1	1	4300	14.6	143	53	72.8	3040	94	16.2	1.07	7.6	4	49	44	0.7	554	878.3	n/a	n/a
2	52	1	1	1	11	11	186	75.8	0	1	0	0	1	4870	10	69	62	76.36	3457.7	827.9	4.3	0.46	6.5	3.1	132	14	0.2	1178	14399.9	151	n/a
2	27	1	0	0	90	11	112	3.08	0	1	0	0	1	2350	10.9	218	43	100.1	1500	650	3.9	0.43	6	3.4	344	326	0.4	842	747.5	133	260
2	56	0	1	1	24	24	52	0.077	0	2	0	0	1	22940	13.5	346	64	32.6	16550	4600	14.4	0.79	7.1	3.6	204	144	0.6	1249	441.8	n/a	n/a
2	77	1	0	0	90	49	126	7.05	0	1	0	0	1	13050	9.4	461	120	122	11490	830	14	0.67	6	2.8	146	68	0.2	2597	1500	147	195
2	38	0	0	0	77	42	111	2.9	0	1	0	0	1	3620	14.5	78	31	53.29	1740	1410	8.2	1.13	6.8	3.7	61	30	0.5	459	726.7	82	n/a
2	68	0	1	1	8	8	136	12.36	0	1	0	0	1	4560	10.7	133	120	228	4110	340	29.8	1.75	5.7	2.5	178	185	1.3	1027	13308.3	n/a	425
2	61	1	1	1	32	32	186	75.8	0	1	0	0	1	2500	9.3	92	73	39.5	1700	580	5.7	0.6	5.8	3.1	96	38	0.6	1408	15363	163	377
2	49	1	0	0	90	13	166	47.55	0	1	0	0	1	7510	13	77	44	8.11	5557	525.7	13.9	0.7	5.7	2.5	576	367	0.9	1281	7734	389	n/a
2	35	1	0	0	90	10	98	1.32	0	2	0	0	1	6560	10.7	262	72	80.5	5600	580	8.3	0.47	6.1	3.1	43	30	0.4	461	1462.5	60	186
2	33	0	0	0	90	7	68	0.2	0	1	0	0	1	3640	15.1	146	33	63.4	2190	1170	18	1.1	7.5	4.2	69	60	0.7	979	1500	n/a	n/a
2	32	1	0	0	90	14	72	0.26	0	2	0	1	1	1740	12.5	121	48	25.4	1160	460	8.5	0.41	6.6	3.6	24	9	0.2	226	246.2	119	n/a
2	25	1	0	0	90	17	126	7.05	0	1	0	1	1	5250	11.7	165	30	30	3850	940	5.6	0.41	5.9	3.1	632	178	0.5	701	3180.3	115	n/a
2	35	0	0	0	39	11	92	0.91	0	1	0	0	1	1370	12.4	72	36	3.36	680	540	12.3	1	6.2	3.6	64	23	0.3	872	700	87	n/a
2	32	0	0	0	22	12	75	0.32	0	1	0	1	1	2560	14.3	218	22	16.56	1870	520	9.2	0.75	6.9	4	125	162	0.7	520	1364.4	81	297
2	42	1	0	0	90	10	68	0.2	0	1	0	0	1	2950	9.8	143	74	94.03	2510	270	11	0.92	7.4	3.4	93	41	0.7	227	1457.5	n/a	n/a
2	35	1	0	0	90	242	131	9.38	0	1	0	0	1	150	10.6	135	73	48	90	40	60.1	12.1	5.7	2.4	94	157	0.4	591	5745.8	209	640
2	48	0	0	0	90	11	52	0.077	0	1	0	0	1	2720	13.3	146	19	12.5	1640	970	18.6	1.09	6.8	3.7	64	23	0.4	1780	1042.3	n/a	n/a
1	27	1	0	0	90	48	91	0.85	0	2	0	1	1	16550	10.6	213	61	149.2	14460	1280	14.6	0.91	6.6	3.3	50	32	0.4	493	2786.3	103	618
1	52	1	1	1	8	9	153	28.82	0	1	0	0	0	9930	9.8	372	63	126.5	8800	510	9.8	0.49	5.1	2.3	186	123	0.4	520	6310	77	302
1	38	0	1	1	51	52	230	97.75	1	1	0	1	0	890	12.2	28	11	28.9	436.1	356	15.1	0.65	5.7	3.1	322	496	4	914	14220.4	204	208
1	55	1	1	1	23	25	126	7.05	0	1	0	0	0	8550	9.2	315	103	138.5	7350	770	12.7	0.29	7.1	3.6	77	37	0.4	362	5558.5	156	609
1	24	1	1	1	23	23	205	91.05	1	1	1	1	1	6960	9.3	134	30	72.2	6500	280	16.8	0.95	5.4	2.7	229	109	1.4	1424	31811.9	211	236
1	33	1	1	1	23	27	215	94.97	1	1	1	1	1	34940	11.6	173	75	166.1	31540	1590	16.6	0.71	3.9	1.6	291	112	0.7	2948	1457.8	306	234
1	68	1	0	0	90	21	68	0.2	0	2	0	0	1	15150	10.8	411	79	67.5	12830	1160	9.3	0.61	5.8	3.2	47	27	0.4	353	1755.4	105	692
1	52	1	1	1	22	23	107	2.28	0	2	0	1	1	19020	10.9	437	79	97.2	16050	1590	7.2	0.65	6.6	3	29	11	0.6	451	4364.1	n/a	n/a
1	59	1	1	1	66	66	137	13.05	0	2	0	0	1	21290	9.1	377	68	124.13	19670	550	12.1	1.08	5.8	2.3	41	9	0.4	681	6690.8	n/a	n/a
1	56	1	0	0	90	15	166	47.55	0	1	0	0	0	9110	12.3	65	46	86.7	7710	660	12.1	0.43	6.2	3.4	88	61	0.3	815	15000	383	297
1	52	1	1	1	11	11	165	46	0	1	0	0	1	4590	11.7	96	82	61.82	3304.8	918	9.4	0.53	6.5	3.1	76	10	0.4	872	11510.8	151	n/a
1	44	1	0	0	90	22	125	6.66	0	2	0	1	0	9680	10.3	241	61	95.7	8350	490	14.1	1.13	6.3	3	44	22	0.4	569	16500	n/a	n/a
1	63	1	0	0	90	35	68	0.2	0	1	0	0	0	22170	9.9	405	86	363	20850	700	16.8	0.85	6.1	2.8	95	61	0.6	622	16500	198	473
1	35	1	0	0	90	9	118	4.41	0	2	0	0	0	8310	10.3	299	91	48.1	6990	880	5.6	0.8	5.8	2.9	43	25	0.2	607	10658.9	162	384
1	50	1	0	0	90	54	102	1.68	0	1	0	0	0	17430	11.7	240	84	258.66	16120	940	7.9	0.8	6.5	3.5	26	13	0.4	338	5203.8	168	334
1	27	1	0	0	90	30	52	0.077	0	1	0	0	0	13630	13.3	213	28	22.8	9850	1670	10.9	0.89	7.2	3.6	432	633	1	358	1321.9	n/a	n/a
1	69	1	0	0	90	49	102	1.68	0	2	0	0	1	10550	10.2	288	108	255	9330	980	10.1	0.8	5.8	3	34	19	0.3	414	9345.6	n/a	n/a
1	72	1	1	1	14	23	147	21.82	0	2	0	0	0	4550	9.2	36	4	4.03	2980	660	37.5	1.1	6.3	3	27	17	1.2	805	7441.3	n/a	113
1	28	1	0	0	90	19	102	1.68	0	1	0	0	0	8460	11.2	164	51	125	7380	490	3.5	0.6	6.2	3	66	74	0.4	1070	34845	n/a	n/a
1	37	1	0	0	90	10	102	1.68	0	2	0	0	0	6870	11.5	204	25	52.4	5100	1000	8.5	0.6	7.9	3.7	303	592	0.5	1384	6856.1	n/a	n/a
1	45	1	0	0	90	21	87	0.67	0	1	0	0	0	3920	10.5	164	51	22.4	2450	790	10.1	1.1	7	3.2	93	25	0.8	983	2853.3	n/a	n/a
1	26	1	0	0	90	7	70	0.23	0	1	0	0	1	5640	13	160	15	15	4480	840	10.2	0.8	7.2	4.4	101	68	0.4	979	769.7	n/a	n/a
1	29	1	0	0	90	9	19	0.009	0	1	0	0	0	6400	9.8	146	66	20.2	4670	1310	8	0.5	6.8	3.7	95	88	0.2	2153	1534.2	n/a	n/a
1	30	1	1	1	7	7	225	97.23	1	1	0	0	1	1930	10.4	69	25	90.21	1450	400	12.3	0.58	6.4	3.9	34	35	0.8	351	10769	n/a	129
1	43	0	0	0	90	21	107	2.28	0	2	0	0	1	15340	13	250	95	123.13	13480	1170	11.6	0.95	6.3	3.2	21	30	0.3	388	519.5	n/a	n/a
1	59	1	0	0	90	53	102	1.68	0	1	0	0	0	15500	10.5	195	55	92.7	11400	3140	11.6	0.4	6.2	3.7	51	22	0.9	1230	10765.9	n/a	n/a
1	38	1	0	0	90	30	68	0.2	0	2	0	0	0	29040	11.5	305	120	263.7	26870	1160	11.1	0.38	7.1	3.6	52	48	0.4	280	413.2	n/a	n/a
1	54	1	1	1	1	1	192	81.96	1	1	0	1	0	11680	15	112	6	108.94	3971.2	2452.8	19.6	0.56	5.5	2.6	1402	420	5.7	1939	15000	261	104
1	53	1	0	0	90	98	136	12.36	0	1	0	0	0	11500	12.4	98	75	410	10400	600	33.4	1.46	5.7	3	92	25	0.6	873	15000	n/a	310
1	41	1	0	0	90	22	102	1.68	0	1	0	0	1	2000	9.1	80	18	25.9	1040	760	7.4	0.7	6.2	3	1338	740	0.8	2102	854.9	n/a	n/a
1	43	1	0	0	90	27	106	2.14	0	2	1	1	1	13880	10.9	254	120	293	12040	1070	9	0.7	6.5	3.1	378	994	0.6	553	7197.6	134	372
1	65	1	0	0	90	64	110	2.73	0	2	0	1	1	7000	11.1	274	58	14.87	4890	1030	23.6	0.82	6.8	3.9	36	18	0.5	530	2348	n/a	n/a
1	55	1	0	0	90	14	103	1.79	0	2	0	0	0	18890	11	203	120	203.5	17560	730	16.9	0.92	5.5	2.7	36	26	0.3	377	3434.8	85	n/a
1	62	1	0	0	57	48	138	13.77	0	1	0	0	1	10710	13	175	60	54.2	8350	1500	10.6	0.69	6.5	3	637	505	1.1	783	3398.2	176	n/a
1	42	1	0	0	90	12	118	4.41	0	1	0	0	0	15710	10	177	42	125	14190	650	11.8	0.7	5.8	2.8	52	131	0.6	838	16100	n/a	n/a
1	65	1	1	1	16	16	238	98.74	1	1	1	1	1	29460	8.8	296	6	133.3	26440	2030	11.5	0.29	6	3.3	154	25	0.6	1141	15000	317	186
